# Supplementary material for: A Novel Intercellular Communication-Associated Gene Signature for Prognostic Prediction and Clinical Value in Patients With Lung Adenocarcinoma
Source: Front Genet. 2021 Aug 23;12:702424. doi: 10.3389/fgene.2021.702424 (PMC8419521; doi:10.3389/fgene.2021.702424)
Supplement: Supplementary File 2 — The baseline characteristics of research subjects in each GEO dataset and the TCGA dataset. [file Data_Sheet_2.xlsx]

## Sheet: Sheet1
		The Discovery Set							The validation set
		GSE19188	GSE31210	GSE30219	GSE31546	GSE37745	GSE50081	GSE68465	TCGA
LUAD Samples		40	226	85	16	106	127	442	535
Age, mean (SD)		-	59.58 (7.40)	61.49 (9.28)	-	62.94 (9.22)	68.73 (9.71)	64.39 (10.09)	65.56 (10.09)
Gender, n (%)	Male	25 (62.50)	105 (46.46)	66 (77.65)	3 (18.75)	46 (43.40)	65 (51.18)	223 (50.45)	249 (46.54)
Ever-smoker, n (%)		-	111 (49.12)	-	12 (75.00)	-	92 (72.44)	300 (67.87)	-
Stage, n (%)	I	-	168 (74.34)	71 (83.53)	-	70 (66.04)	92 (72.44)	-	294 (55.79)
	II	-	58 (25.66)	13 (15.29)	-	19 (17.92)	35 (27.56)	-	123 (23.34)
	III	-	0 (0.00)	1 (1.18)	-	13 (12.26)	0 (0.00)	-	84 (15.94)
	IV	-	0 (0.00)	0 (0.00)	-	4 (3.77)	0 (0.00)	-	26 (4.93)
T, n (%)	1	-	-	71 (83.53)	11 (68.75)	-	43 (33.86)	150 (33.94)	175 (32.71)
	2	-	-	12 (14.12)	5 (31.25)	-	82 (64.57)	251 (56.79)	289 (54.02)
	3	-	-	2 (2.35)	0 (0.00)	-	2 (1.57)	28 (6.33)	49 (9.16)
	4	-	-	0 (0.00)	0 (0.00)	-	0 (0.00)	11 (2.49)	19 (3.55)
	X	-	-	0 (0.00)	0 (0.00)	-	0 (0.00)	0 (0.00)	3 (0.56)
N, n (%)	0	-	-	82 (96.47)	15 (93.75)	-	94 (74.02)	299 (67.65)	348 (65.17)
	1	-	-	3 (3.53)	1 (6.25)	-	33 (25.98)	87 (19.68)	95 (17.79)
	2	-	-	0 (0.00)	0 (0.00)	-	0 (0.00)	53 (11.99)	74 (13.86)
	3	-	-	0 (0.00)	0 (0.00)	-	0 (0.00)	0 (0.00)	2 (0.37)
	X	-	-	0 (0.00)	0 (0.00)	-	0 (0.00)	1 (0.23)	15 (2.81)
M, n (%)	0	-	-	85 (100.00)	-	-	127 (100.00)	-	361 (68.24)
	1	-	-	0 (0.00)	-	-	0 (0.00)	-	25 (4.73)
	X	-	-	0 (0.00)	-	-	0 (0.00)	-	143 (27.03)
